# Supplementary material for: A Randomized Controlled Trial of Subcutaneous Nerve Stimulation for Back Pain Due to Failed Back Surgery Syndrome: The SubQStim Study
Source: PubMed Central journal article supplement — Neuromodulation. 2018 Apr 28;22(5):519–28. doi: 10.1111/ner.12784 (PMC6767391; doi:10.1111/ner.12784), 2018-04-28
Supplement: NER-22-519-s001.pdf [file NER-22-519-s001.pdf]

**Supplementary information – not part of the paper but accessible electronically****Table S1: Enrolment by Site**

| Site Name, Country                                                          | Subjects<br>Enrolled |
|-----------------------------------------------------------------------------|----------------------|
| The James Cook Hospital, United Kingdom                                     | 27                   |
| ZNA Middelheim, Belgium                                                     | 20                   |
| EHC – Hôpital de Morges, Switzerland                                        | 17                   |
| Clinique Brétéché, France                                                   | 12                   |
| Albert Schweitzer Ziekenhuis, The Netherlands                               | 12                   |
| AZ Sint Jan, Belgium                                                        | 11                   |
| Hôpital Neurologique et Neurochirurgical Pierre Wertheimer, France          | 9                    |
| Hopital Purpan, Hôpital Pierre-Paul Riquet, France                          | 8                    |
| INDC Jolimont, Belgium                                                      | 7                    |
| Amphia Ziekenhuis, The Netherlands                                          | 6                    |
| Greenslopes Private Hospital, Australia                                     | 5                    |
| Krankenhaus der Barmherzigen Brüder Wien, Austria                           | 4                    |
| Maasstad Ziekenhuis, The Netherlands                                        | 4                    |
| Universitätsklinikum Jena, Germany                                          | 4                    |
| Tel Aviv Medical Center, Israel                                             | 3                    |
| Pain Management & Research Centre, Royal North Shore Hospital,<br>Australia | 3                    |
| Klagenfurt am Wörthersee (LKH Klagenfurt), Austria                          | 3                    |

| <b>Site Name, Country</b>                                | <b>Subjects<br/>Enrolled</b> |
|----------------------------------------------------------|------------------------------|
| AZ Delta, Belgium                                        | 2                            |
| Hospital Universitario DEL RIO HORTEGA, Spain            | 2                            |
| Märkische Kliniken GmbH/Marienhospital Letmathe, Germany | 2                            |
| Metro Spinal Clinic, Australia                           | 1                            |
